# Supplementary material for: The Stability of G6PD Is Affected by Mutations with Different Clinical Phenotypes
Source: MDPI journal article supplement (doi:10.3390/ijms151121179), 2014-11-17

## Supplementary Information

**Table S1.** Strains, plasmids, and primers used in this study. The locations of restriction sites in the primer sequences are underlined, and the mutagenic oligonucleotides are in bold.

| Strain                          | Relevant Characteristic(s) or Sequence                                                                                              | Source and/or Reference |
|---------------------------------|-------------------------------------------------------------------------------------------------------------------------------------|-------------------------|
| <b><i>E. coli</i></b>           |                                                                                                                                     |                         |
| BW25113                         | F <sup>-</sup> , DE(araD-araB)567, lacZ4787(del)::rrnB-3, LAM <sup>-</sup> , rph-1, DE(rhaD-rhaB)568, hsdR514                       | [35]                    |
| BL21(DE3)                       | F <sup>-</sup> ompT gal dcm lon hsdSB(rB <sup>-</sup> mB <sup>-</sup> ) λ(DE3 (lacI lacUV5-T7 gene 1 ind1 sam7 nin5))               | Novagen                 |
| JW1841                          | Δ(araD-araB)567, ΔlacZ4787(::rrnB-3), λ <sup>-</sup> , Δzwf-777::kan, rph-1, Δ(rhaD-rhaB)568, hsdR514                               | [16]                    |
| BL21(DE3)Δzwf::kan <sup>r</sup> | F <sup>-</sup> ompT gal dcm lon hsdSB(rB <sup>-</sup> mB <sup>-</sup> ) λ(DE3 (lacI lacUV5-T7 gene 1 ind1 sam7 nin5)) Δzwf-777::kan | this study              |
| <b>Plasmids</b>                 |                                                                                                                                     |                         |
| pJET-1.2                        | Cloning vector; Amp <sup>R</sup>                                                                                                    | Thermo Scientific       |
| pET-3a                          | Expression vector, Amp <sup>R</sup>                                                                                                 | Novagen                 |
| pJg6pd                          | pJET-1.2 carrying the human <i>g6pd</i> gene, Amp <sup>R</sup>                                                                      | this study              |
| pJgK429E                        | pJET-1.2 carrying the human <i>g6pd</i> gene with a K429E mutation in the G6PD protein, Amp <sup>R</sup>                            | this study              |
| pJgR136C                        | pJET-1.2 carrying the human <i>g6pd</i> gene with an R136C mutation in the G6PD protein, Amp <sup>R</sup>                           | this study              |
| pJgR227Q                        | pJET-1.2 carrying the human <i>g6pd</i> gene with an R227Q mutation in the G6PD protein, Amp <sup>R</sup>                           | this study              |
| pJgR393H                        | pJET-1.2 carrying the human <i>g6pd</i> gene with an R393H mutation in the G6PD protein, Amp <sup>R</sup>                           | this study              |
| pETg6pd                         | pET-3a carrying the human <i>g6pd</i> gene, Amp <sup>R</sup>                                                                        | this study              |
| pETgK429E                       | pET-3a carrying the human <i>g6pd</i> gene with a K429E mutation in the G6PD protein, Amp <sup>R</sup>                              | this study              |
| pEtgR136C                       | pET-3a carrying the human <i>g6pd</i> gene with an R136C mutation in the G6PD protein, Amp <sup>R</sup>                             | this study              |
| pETgR227Q                       | pET-3a carrying the human <i>g6pd</i> gene with an R227Q mutation in the G6PD protein, Amp <sup>R</sup>                             | this study              |
| pETgR393H                       | pET-3a carrying the human <i>g6pd</i> gene with an R393H mutation in the G6PD protein, Amp <sup>R</sup>                             | this study              |
| <b>Cloning Oligonucleotides</b> |                                                                                                                                     |                         |
| Flanking <i>NdeI</i> forward    | 5'-CGACAGCCATATGGCAGAG-3'                                                                                                           | [17]                    |
| Flanking <i>Bpu</i> reverse     | 5'-TGCGCTGAGCTCAGAGCTT-3'                                                                                                           | [17]                    |

Table S1. Cont.

| Strain                                                  | Relevant Characteristic(s) or Sequence | Source and/or Reference |
|---------------------------------------------------------|----------------------------------------|-------------------------|
| <b>Mutagenesis</b>                                      |                                        |                         |
| K429E forward                                           | 5'-CAGATACAGGAACGTGAAGC-3'             | this study              |
| K429E reverse                                           | 5'-GCTTCACGTTCTGTATCTG-3'              | this study              |
| R136C forward                                           | 5'-GGCCAACCTGCCTCTTCTAC-3'             | this study              |
| R136C reverse                                           | 5'-GTAGAAGAGGCAGTTGGCC-3'              | this study              |
| R227Q forward                                           | 5'-CTGGAACCAGGACAACATCG-3'             | this study              |
| R227Q reverse                                           | 5'-CGATGTTGTCCTGGTTCCAG-3'             | this study              |
| R393H forward                                           | 5'-GCTGGTGATCCACGTGCAGCCC-3'           | this study              |
| R393H reverse                                           | 5'-GGGCTGCACGTGGATCACCAGC-3'           | this study              |
| <b>Oligonucleotides for Sequencing and Verification</b> |                                        |                         |
| pJET-1.2 forward                                        | 5'-CGACTCACTATAGGGAGAGCGGC-3'          | Thermo Scientific       |
| pJET-1.2 reverse                                        | 5'-AAGAACATCGATTTTCCATGGCAG-3'         | Thermo Scientific       |
| Internal G6PD forward                                   | 5'-GGCCAACCTGCCTCTTCTAC-3'             | this study              |
| Internal G6PD reverse                                   | 5'-GAGAAGGTCAAGATGTTGAAATG-3'          | this study              |
| K1                                                      | 5'-CAGTCATAGCCGAATAGCCT-3'             | [16]                    |
| K2                                                      | 5'-CGGTGCCCTGAATGAACTGC-3'             | [16]                    |
| -100 bp <i>zwf</i> forward                              | 5'-GCTTTTCCCGTAATCGCAC-3'              | this study              |
| +100 bp <i>zwf</i> reverse                              | 5'-GACTGAAACGCCTGTAACC-3'              | this study              |

**Figure S1.** Specific activity obtained using the optimal expression conditions in *E. coli* BL21(DE3) $\Delta zwf::kan^r$  cells is shown. The optimal expression conditions were as follows: for WT G6PD, 0.5 mM IPTG at 25 °C and 18 h expression time; for Yucatan, 0.1 mM IPTG at 25 °C and 18 h expression time; for Valladolid, 0.5 mM IPTG at 25 °C and 18 h expression time; for Mexico City, 0.1 mM IPTG at 25 °C and 18 h expression time; and for Nashville, 0.5 mM IPTG at 37 °C and 6 h of expression time. The G6PD activity after induction with IPTG was indicative of the expression level of the recombinant soluble protein.

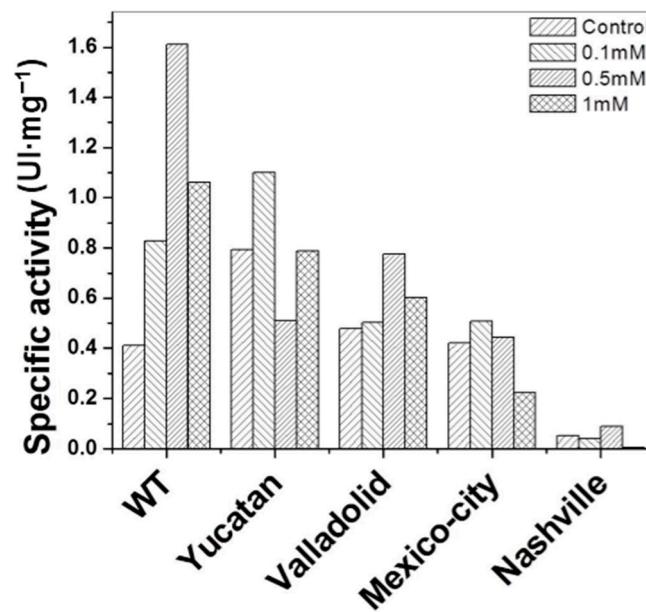

Supplement: s1 [file s1]
